# Supplementary material for: COVID-19 in Italy: Comparison of CT Findings from Time Zero to the Delta Variant
Source: MDPI journal article supplement (doi:10.3390/microorganisms10040796), 2022-04-09
Supplement: s1 [file s1]

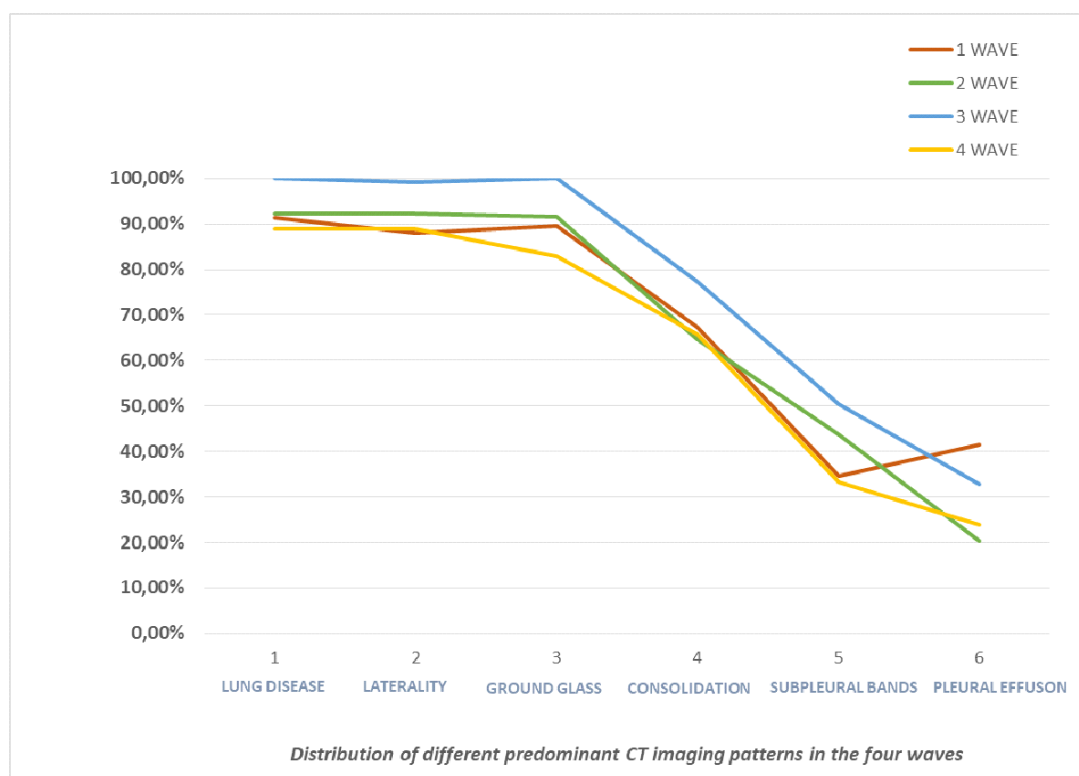

**Figure S1.** Percentage distribution of predominant CT patterns in the four waves.

**Table S1.** Graphic representation of mean CT-scores in age groups through all waves of disease.

| GROUPS OF AGE | FIRST WAVE | SECOND WAVE | THIRD WAVE | FOURTH WAVE |
|---------------|------------|-------------|------------|-------------|
| <49           | 19.17      | 13.61       | 15.77      | 13.17       |
| 50-59         | 13.27      | 11.50       | 16.48      | 14.14       |
| 60-69         | 21.14      | 14.18       | 17.56      | 4.25        |
| 70-79         | 14.18      | 13.78       | 18.43      | 9.50        |
| >80           | 15.05      | 16.04       | 15.13      | 13.53       |

**Table S2.** Percentage distribution of predominant CT patterns in the four waves.

| CT FINDINGS      | FIRST WAVE | SECOND WAVE | THIRD WAVE | FOURTH WAVE |
|------------------|------------|-------------|------------|-------------|
| LUNG DISEASE     | 91.38      | 92.22       | 100        | 88.89       |
| LATERALITY       | 87.93      | 92.22       | 99.16      | 88.89       |
| GROUND GLASS     | 89.66      | 91.62       | 100        | 83          |
| CONSOLIDATION    | 67.24      | 64.67       | 77.31      | 65.80       |
| SUBPLEURAL BANDS | 34.48      | 43.71       | 50.42      | 33.30       |
| PLEURAL EFFUSION | 41.38      | 20.36       | 32.77      | 23.90       |
